# Supplementary material for: Temporal trends in methane emissions from a small eutrophic reservoir: the key role of a spring burst
Source: Copernicus journal article supplement (doi:10.5194/bg-18-5291-2021), 2021-09-30
Supplement: Supplementary file [file bg-18-5291-2021-supplement.pdf]

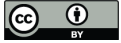

*Supplement of*

## **Temporal trends in methane emissions from a small eutrophic reservoir: the key role of a spring burst**

**Sarah Waldo et al.**

*Correspondence to:* Sarah Waldo (sarahrwaldo@gmail.com)

The copyright of individual parts of the supplement might differ from the article licence.

**Table S1: Measurement methods summary**

| <i>Method</i>             | <i>Flux Measured</i> | <i>Spatial Coverage</i>                         | <i>Frequency</i>                                          | <i>Use</i>                                                                                                                                 |
|---------------------------|----------------------|-------------------------------------------------|-----------------------------------------------------------|--------------------------------------------------------------------------------------------------------------------------------------------|
| Eddy Covariance (EC)      | total net            | ~100s m <sup>2</sup> , north sector of the lake | pseudo-continuous, 30-min timestep                        | <ul style="list-style-type: none"><li>• annual budgets</li><li>• diurnal patterns</li><li>• biophysical drivers: ANN, Q10, 2DKS</li></ul>  |
| Active Funnel Traps (AFT) | ebullition           | 0.3 m <sup>2</sup> , two locations              | pseudo-continuous, 30-min timestep                        | <ul style="list-style-type: none"><li>• annual budgets</li><li>• diurnal patterns</li><li>• biophysical drivers: Q10, 2DKS</li></ul>       |
| Flux Chamber              | diffusion            | 0.2 m <sup>2</sup> per site                     | 2 sites bi-weekly; 15 sites sampled during 6 GRTS surveys | <ul style="list-style-type: none"><li>• annual budgets</li><li>• emission pathway relative importance</li></ul>                            |
| Passive Funnel Traps      | ebullition           | 0.3 m <sup>2</sup>                              | 15 sites sampled during 6 GRTS surveys                    | <ul style="list-style-type: none"><li>• annual budgets</li><li>• spatial patterns</li><li>• emission pathway relative importance</li></ul> |

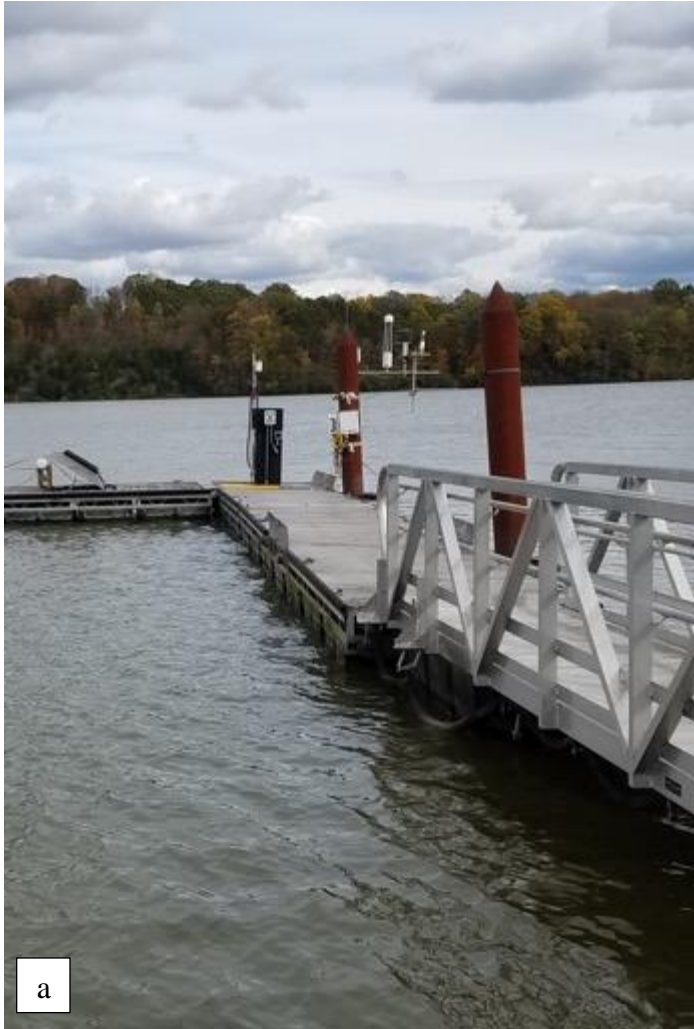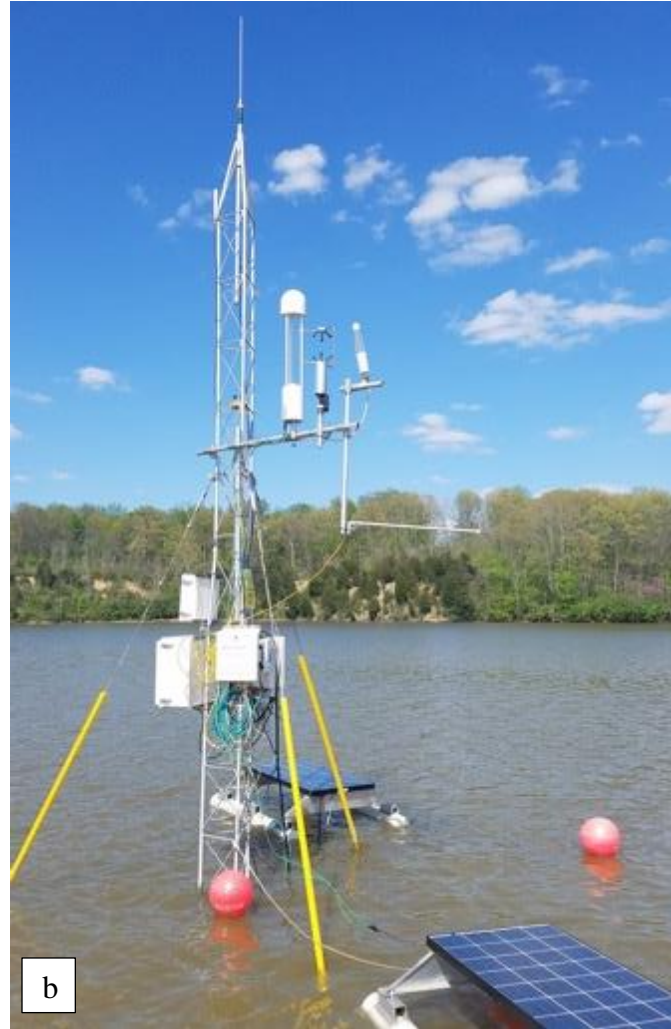

Figure S1: Pictures of eddy covariance measurement locations. Panel a (left): site S-1, dock location for February 2017 – April 2018 monitoring. Panel b (right): site S-2, open-water location for May – November 2018 monitoring.

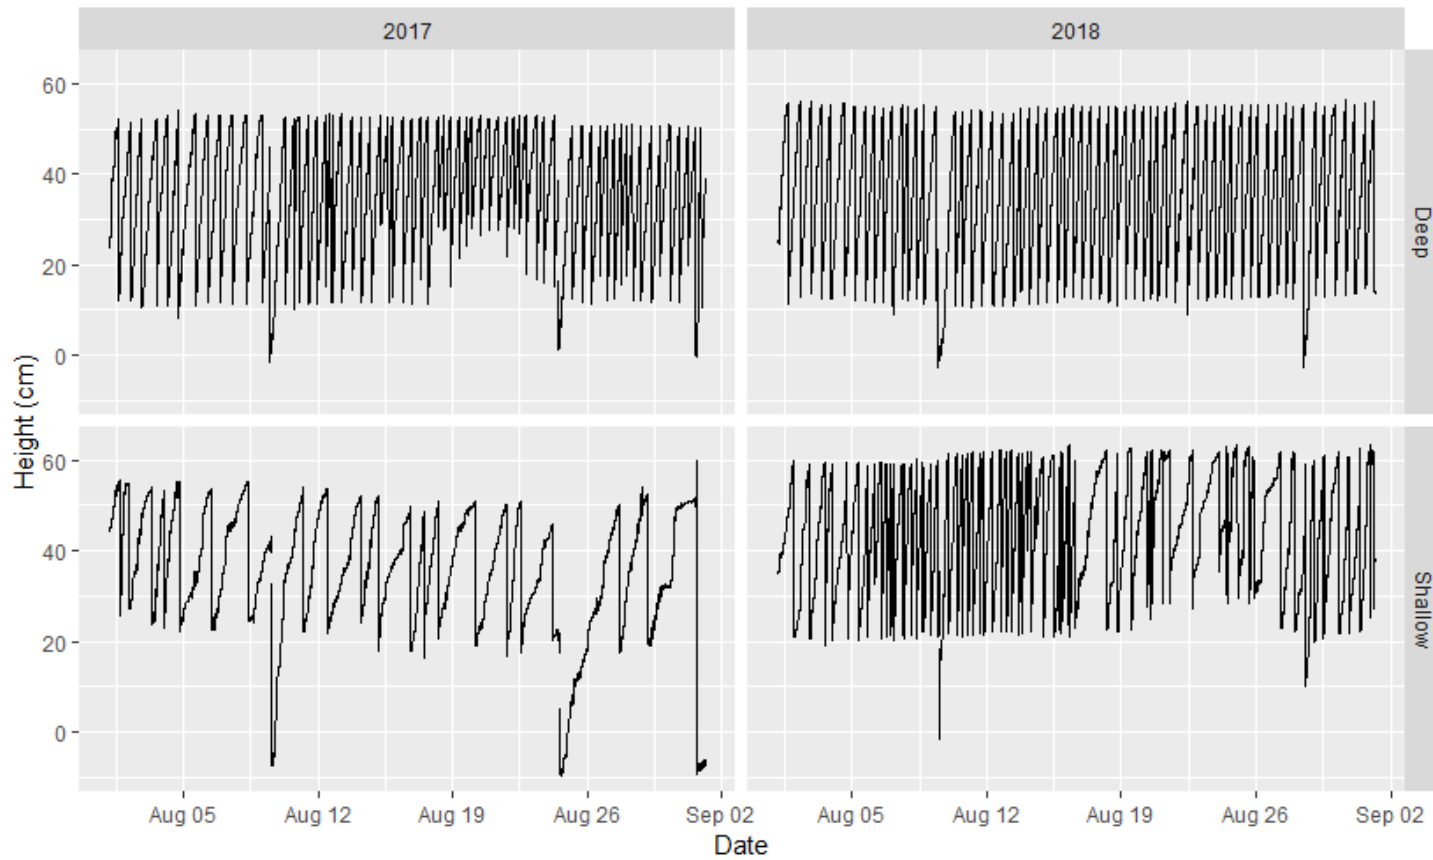

Figure S2: Time series of the raw active trap volume measurements from the two monitoring sites: the deep site (U-12, top), and the shallow site (U-14, bottom).

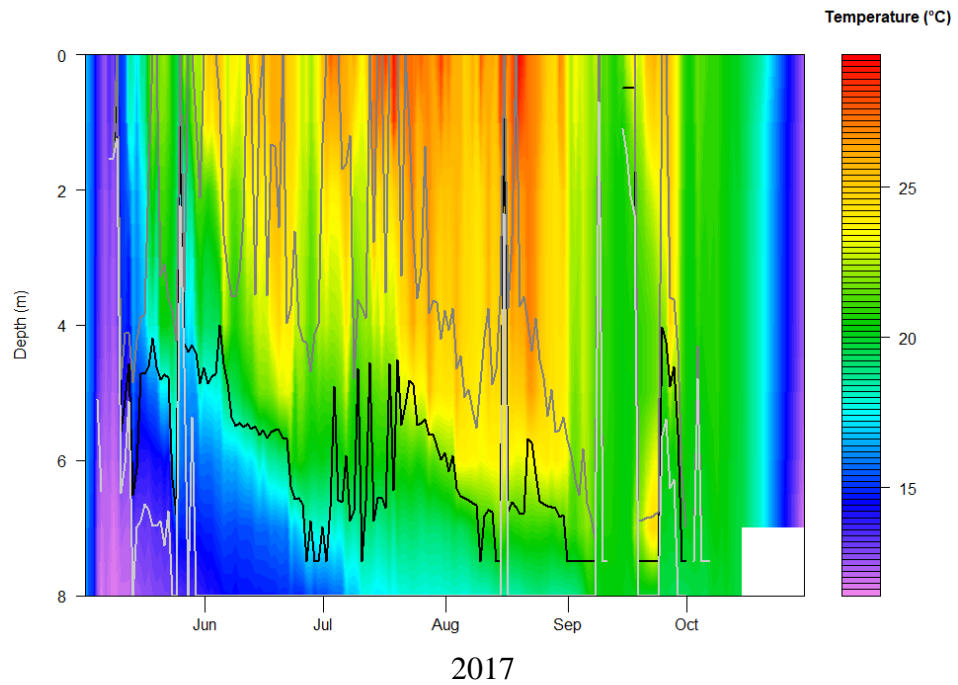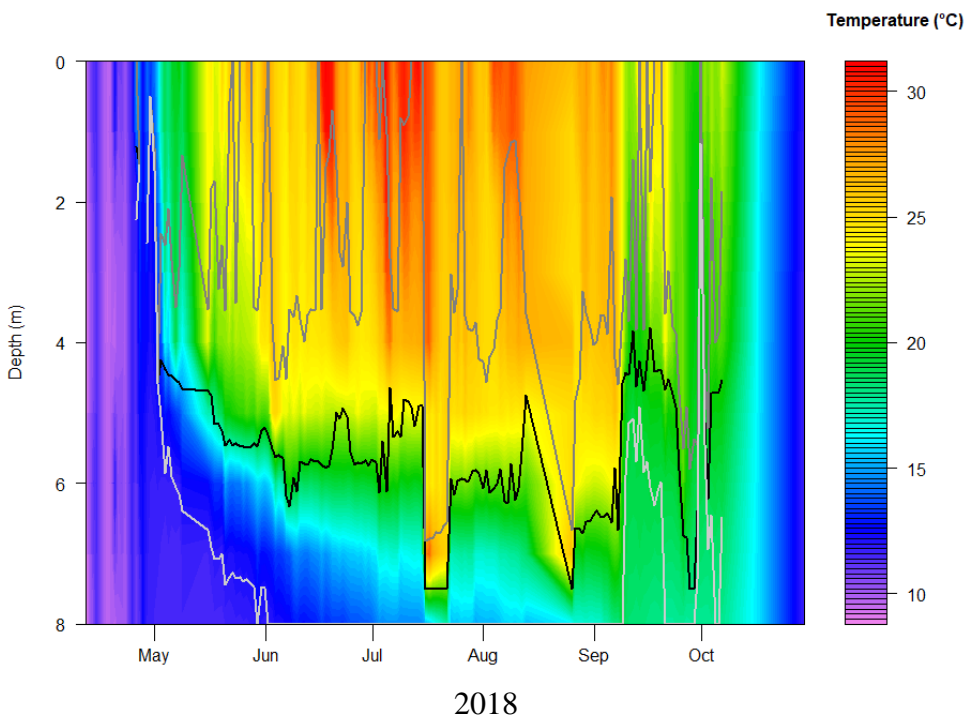

Figure S3: Time series of the water temperature profile including thermocline depth (black line) in 2017 (top) and 2018 (bottom) at the U-14 deep site in Acton Lake.

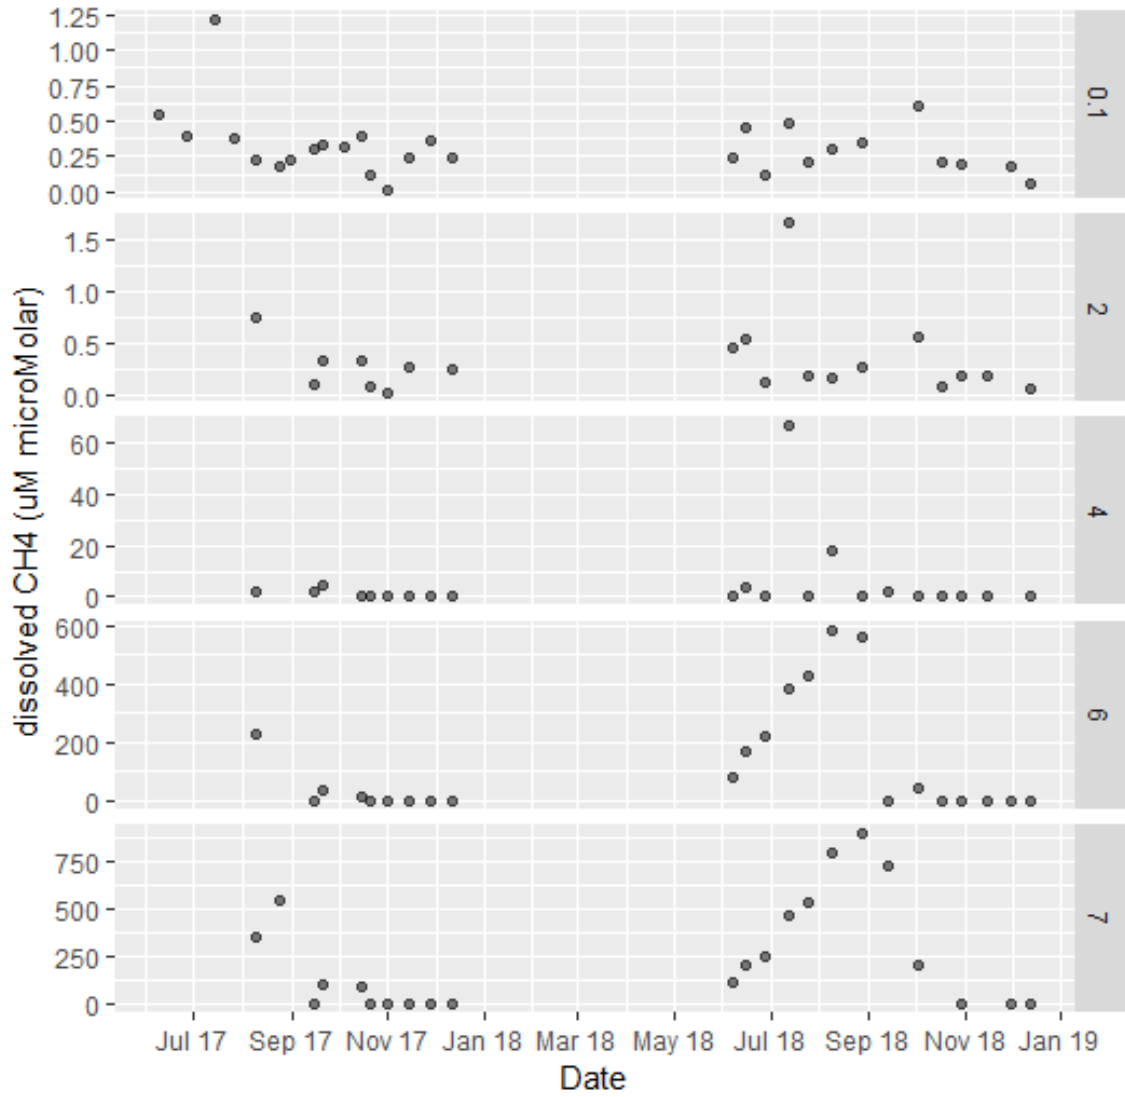

Figure S4: Time series of the depth profile of dissolved CH<sub>4</sub> (uM) at the deep site (U-14) over the 2017-2018 study period. Numbers on the right panels indicate depth in m below surface.

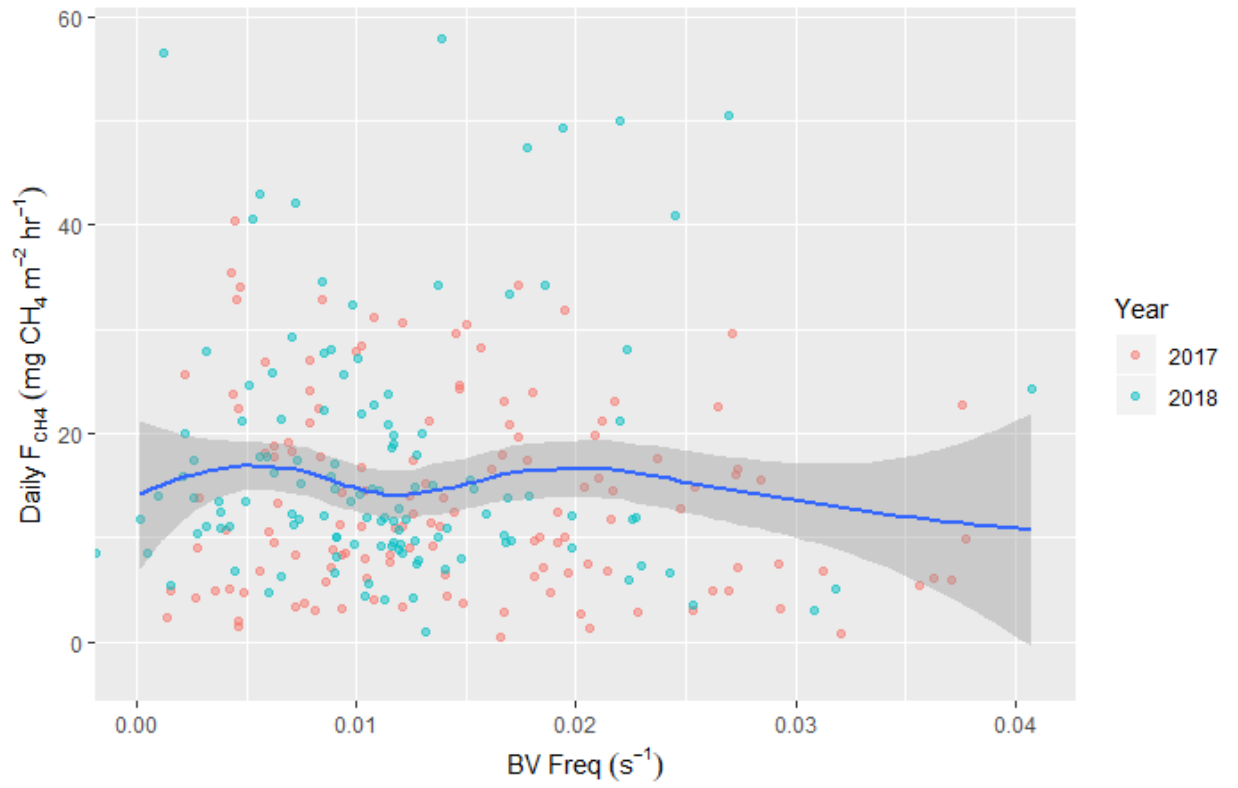

Figure S5: Scatterplot of daily  $F_{\text{CH}_4}$  as a function of the Brunt-Väisälä frequency, an indicator of underwater turbulence.



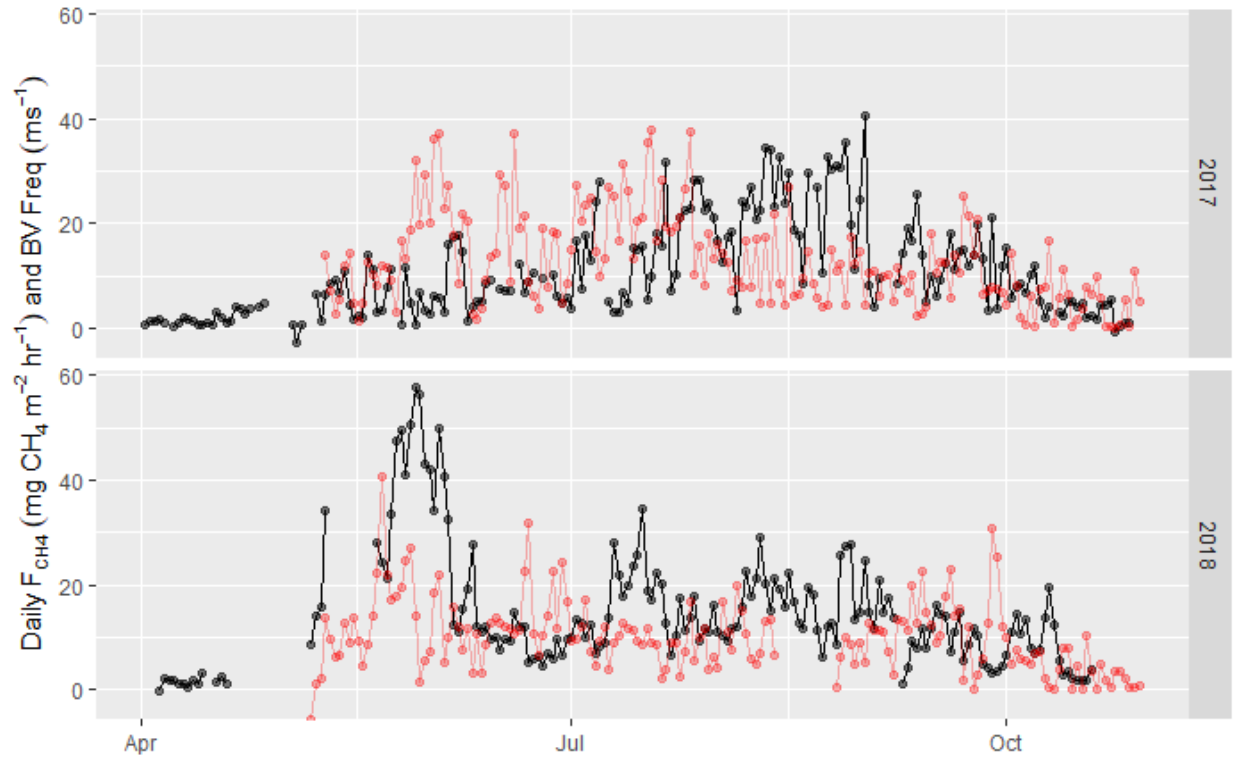

Figure S6: Time series of daily  $F_{\text{CH}_4}$  (black) and Brunt-Väisälä frequency (red) plotted on the same axes.

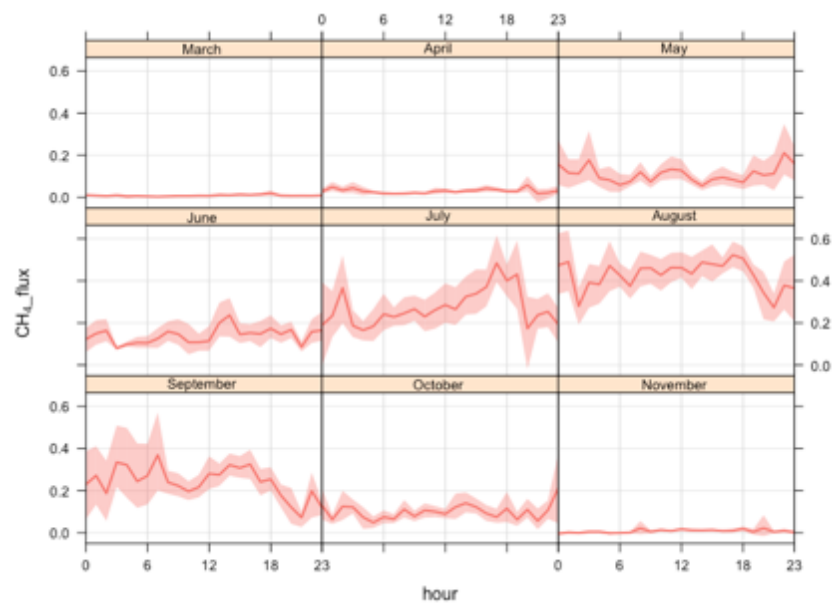

2017

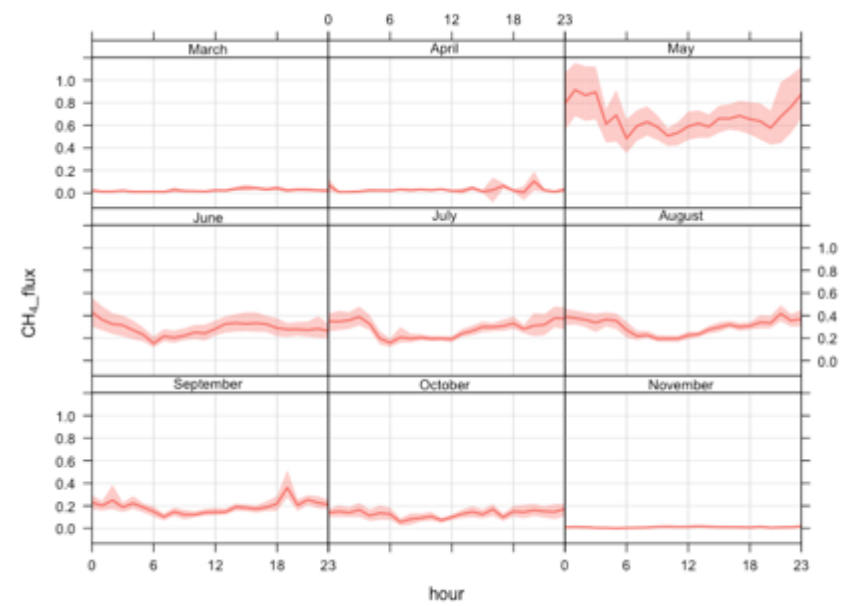

2018

Figure S7: Diurnal  $F_{CH_4}$  ( $\mu\text{mol m}^{-2} \text{h}^{-1}$ ) aggregated over monthly time periods from March-Nov for 2017 (left) and 2018 (right).

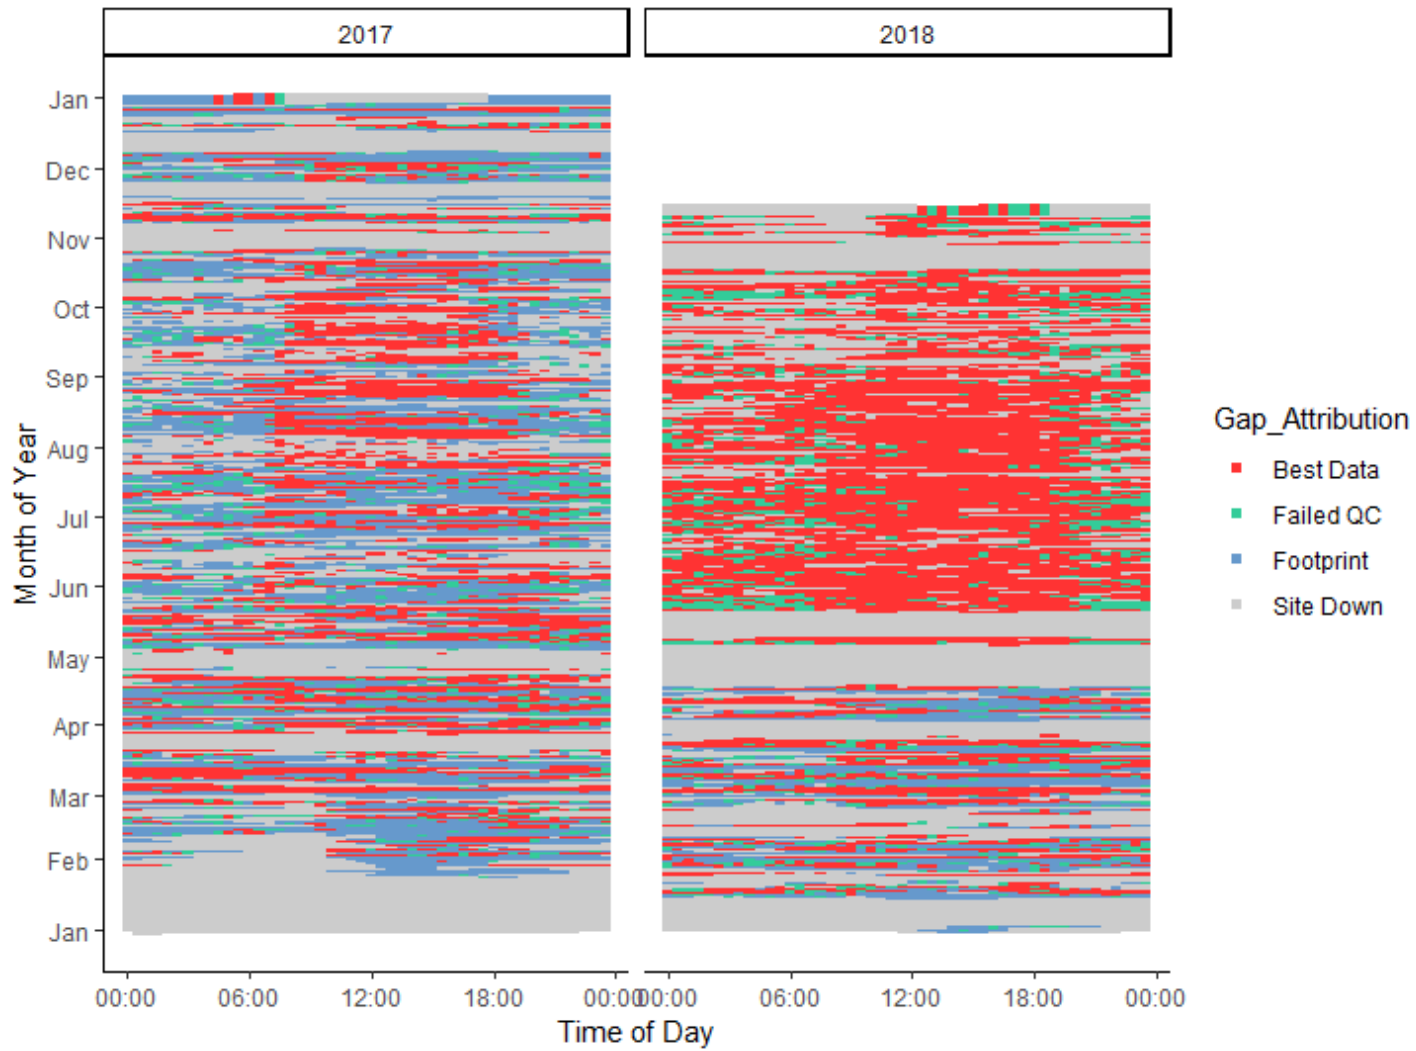

Figure S8: Eddy covariance gap attribution and distribution for 2017 and 2018. Each pixel represents one 30-minute flux measurement period.

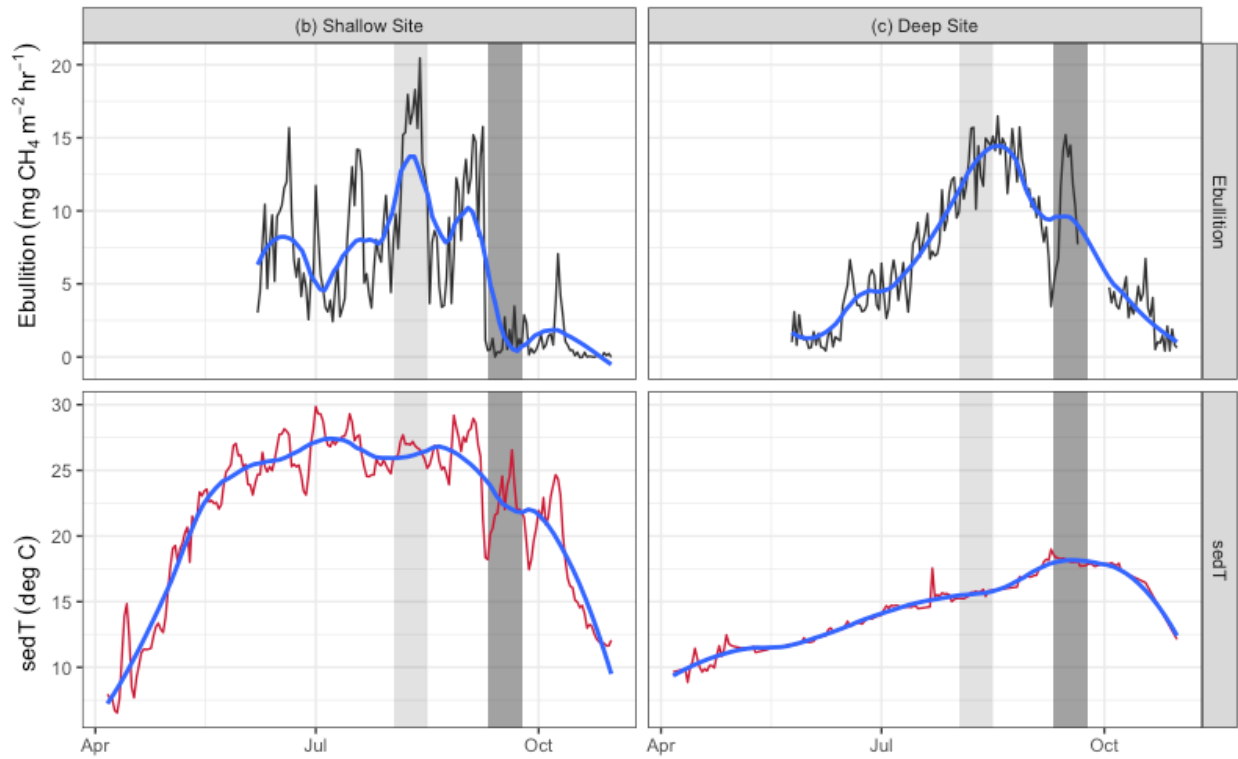

Figure S9: Time series of sedT and ebullition in 2018 at the shallow (a, U-14) and deep (b, U-12) sites. This year did not display the offset relationship between maximum sedT and maximum ebullition observed in 2017 (Fig. 10).

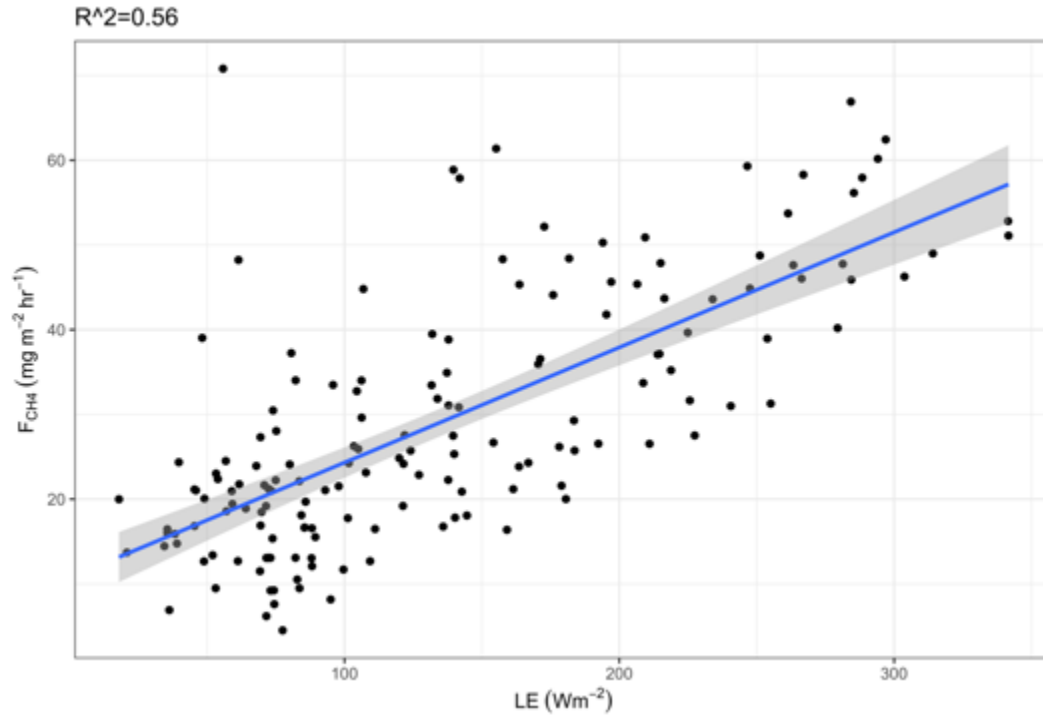

Figure S10: 30-minute methane fluxes as a function of latent heat flux (LE) for several-day period pre- and post-spring burst in 2018 (depicted in Fig 12 (a)). Significant at  $p<0.001$ .

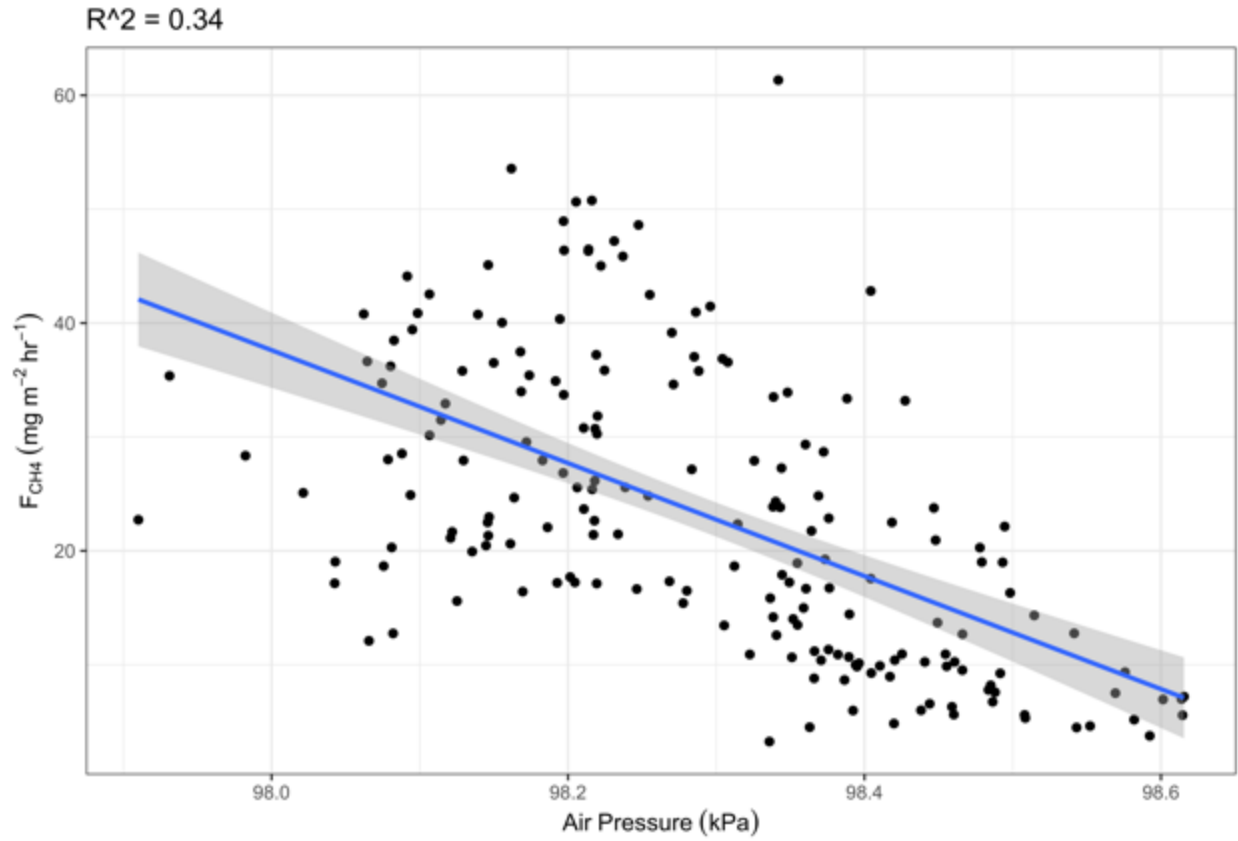

Figure S11: 30-minute methane flux as a function of air pressure for the several-day period depicted in Fig 12 (b). Significant at  $p < 0.001$ .
